# Supplementary material for: Is secondary organic aerosol yield governed by kinetic factors rather than equilibrium partitioning?
Source: Royal Society of Chemistry journal article supplement (doi:10.1039/c7em00451f), 2017-12-12
Supplement: c7em00451f1.pdf [file c7em00451f1.pdf]

1 **Electronic Supplementary Information for**

2 **Is Secondary Organic Aerosol Yield Governed by Kinetic**  
3 **Factors Rather Than Equilibrium Partitioning?**

4 **Chen Wang<sup>1</sup>, Frank Wania<sup>1</sup>, and Kai-Uwe Goss<sup>2,3\*</sup>**

5 <sup>1</sup>*Department of Physical and Environmental Sciences and Department of Chemistry, University*  
6 *of Toronto Scarborough, 1265 Military Trail, Toronto, ON, M1C 1A4, Canada*

7 <sup>2</sup>*Department of Analytical Environmental Chemistry, Centre for Environmental Research UFZ*  
8 *Leipzig-Halle, Permoserstraße 15, Leipzig, D-04318, Germany*

9 <sup>3</sup>*Institute of Chemistry, University of Halle-Wittenberg, Kurt-Mothes-Straße 2, Halle, D-06120,*  
10 *Germany*

11 *\*Corresponding author: kai-uwe.goss@ufz.de, ++49 341 235 1411*

12 **Table of Content**

| Item      | Description                                                                      | Page |
|-----------|----------------------------------------------------------------------------------|------|
| Text      | Description of the method                                                        | S-2  |
| Table S1  | Information for $\alpha$ -pinene oxidation products                              | S-2  |
| Figure S1 | Vapor pressure and reaction yield for oxidation products                         | S-3  |
| Figure S2 | Aqueous phase mass and composition change                                        | S-3  |
| Figure S3 | Total SOA organic phase mass as a function of reacted amount of $\alpha$ -pinene | S-4  |
| Figure S4 | The differential yield and integrative yield versus organic phase loading        | S-4  |
| Figure S5 | Comparison of SOA integrative yield between this study and laboratory studies    | S-4  |
| Figure S6 | The ratio between differential yield and integrative yield                       | S-5  |
| Figure S7 | $\log K_{org/gas}$ at different iterations                                       | S-5  |
| Text      | Calculation of activity coefficients in organic phase                            | S-6  |
| Figure S8 | Activity coefficients for each component in the organic phase                    | S-6  |
| Figure S9 | O:C and H:C ratios in aerosol organic phase                                      | S-7  |
| Text      | Contribution of water in the organic phase                                       | S-7  |
| Text      | Comparison with Wang et al. (2015)                                               | S-7  |
|           | References                                                                       | S-8  |

### 13 Description of the method

14 The method is based on and modified from (Wang et al., 2015). The calculation is for 60%  
 15 relative humidity and 25°C. SOA is assumed to be formed from the equilibrium gas-particle  
 16 partitioning of 15 organic products of the ozonolysis of  $\alpha$ -pinene (Table S1) into a liquid-like  
 17 particle without consideration of condensed phase viscosity or reaction.

18 Table S1 Oxidation products and corresponding yields for the ozonolysis of  $\alpha$ -pinene. List of species and  
 19 yield is the same as that in scenario 1 by (Wang et al., 2015), with C20H30O18 as an extremely  
 20 low volatile organic compound (ELVOC) and the rest as semi-volatile organic compounds  
 21 (SVOCs).

| Name      | Structure | molar<br>yield | molar<br>mass | Name     | Structure | molar<br>yield | molar<br>mass |
|-----------|-----------|----------------|---------------|----------|-----------|----------------|---------------|
| C20H30O18 |           | 0.0304         | 558           | C10H16O8 |           | 0.0304         | 264           |
| C921OOH   |           | 0.0244         | 204           | C812OOH  |           | 0.0213         | 190           |
| HOPINONIC |           | 0.0150         | 200           | PINIC    |           | 0.0333         | 186           |
| C813OOH   |           | 0.0083         | 206           | C97OOH   |           | 0.1150         | 188           |
| PINONIC   |           | 0.1401         | 184           | C811OH   |           | 0.0137         | 158           |
| C107OOH   |           | 0.2385         | 200           | C10H14O7 |           | 0.0304         | 246           |
| C109OOH   |           | 0.0193         | 200           | C89CO2H  |           | 0.0600         | 170           |
| C108OOH   |           | 0.0731         | 216           |          |           |                |               |

22 Note the compounds' name, structure and corresponding stoichiometric yields were derived from  
 23 Master Chemical Mechanism chamber simulations (Shilling et al., 2009) with additional three  
 24 compounds proposed by (Wang et al., 2015) based on the results in (Ehn et al., 2014).

25 The condensed phase is assumed to separate into an organic-enriched phase and an aqueous-  
 26 electrolyte enriched phase. The density of organic and aqueous phase is assumed to be 1.2 and  
 27 1 g/mL, respectively. We assume the atmosphere initially contains an organic seed of 0.5  $\mu$ g of  
 28 C20H20O18 (the compound with the lowest vapor pressure among all of the products, Figure  
 29 S1). A fixed aqueous phase volume is determined by the amount of ammonium sulfate. This is  
 30 calculated at 60% RH and 2.64  $\mu$ g/m<sup>3</sup> ammonium sulfate using AIOMFAC (Zuend et al., 2008;  
 31 Zuend and Seinfeld, 2012). We account for the influence of inorganic salts on gas-particle

partitioning (salting-out effect) and also the partitioning of water into the organic phase. Water in the organic phase is calculated from the gas-organic phase partitioning and the relative humidity. The quantum chemistry program COSMOtherm (Version C30\_1401 with BP\_TZVP\_C30\_1401 parametrization, COSMOlogic, GmbH & Co. KG, Leverkusen, Germany, 2014) (Klamt, 2005; Klamt and Eckert, 2000) was used to calculate partitioning coefficients among the three phases as well as the salting-out effects using methods described previously (Wang et al., 2015; Wang et al., 2014; Wania et al., 2014).

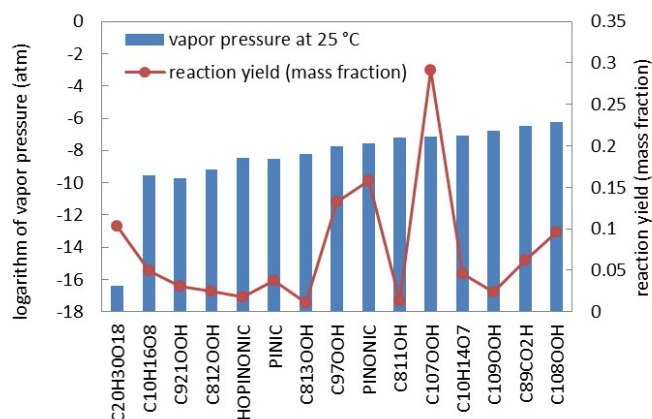

39

40 Figure S1 Vapor pressure (COSMOtherm prediction at 25 °C) and reaction yield (normalized in  
41 mass fractions) for each organic product

42 The mass of organic compounds in the aqueous phase is much lower than in the organic phase,  
43 which increases in the first 60 iterations and starts to decrease slightly from that on. Overall,  
44 the aqueous phase composition is relatively stable and the major organic components are  
45 C812OOH, PINIC and C813OOH (Figure S2).

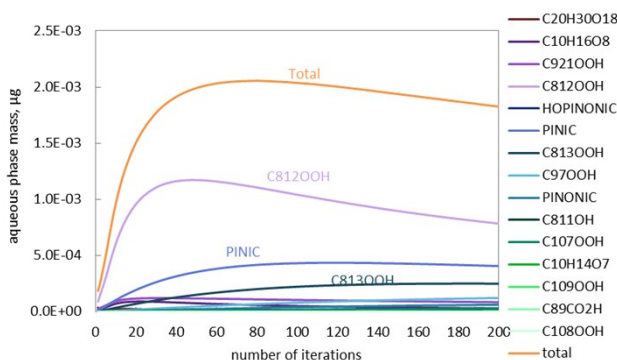

46

47 Figure S2 Aqueous phase mass and composition change (water and salt not included)

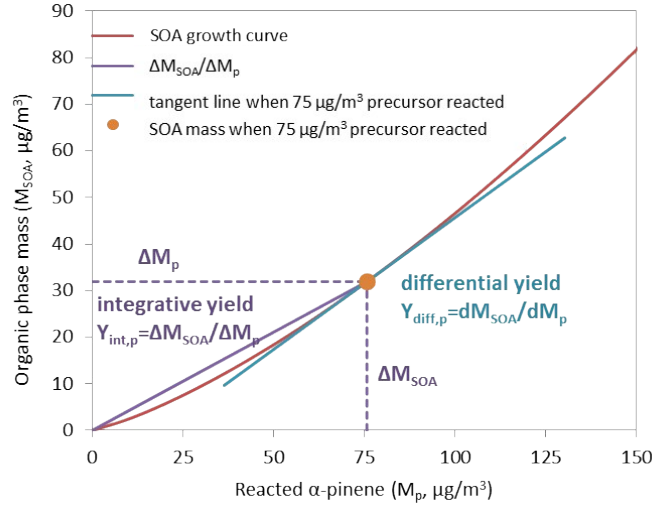

48

49 Figure S3 Total SOA organic phase mass as a function of reacted amount of  $\alpha$ -pinene

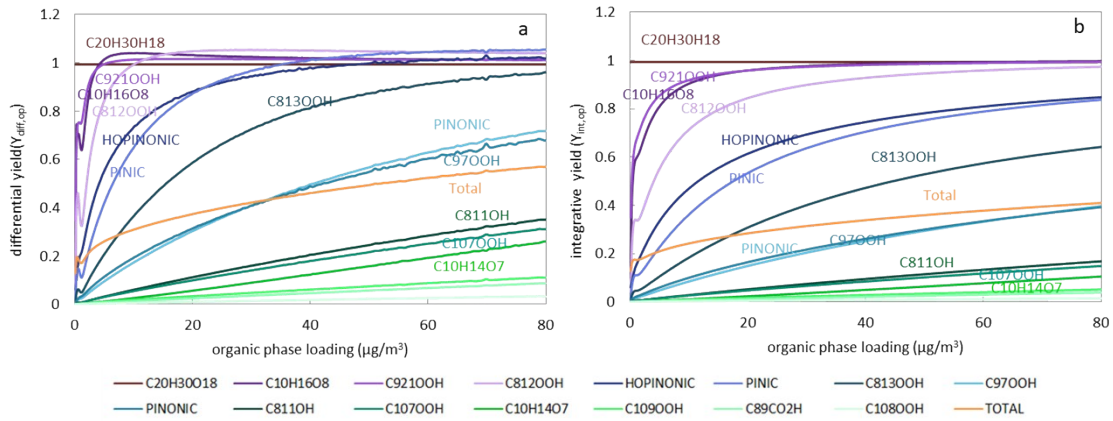

50

51 Figure S4 The differential yield and integrative yield versus organic phase loading

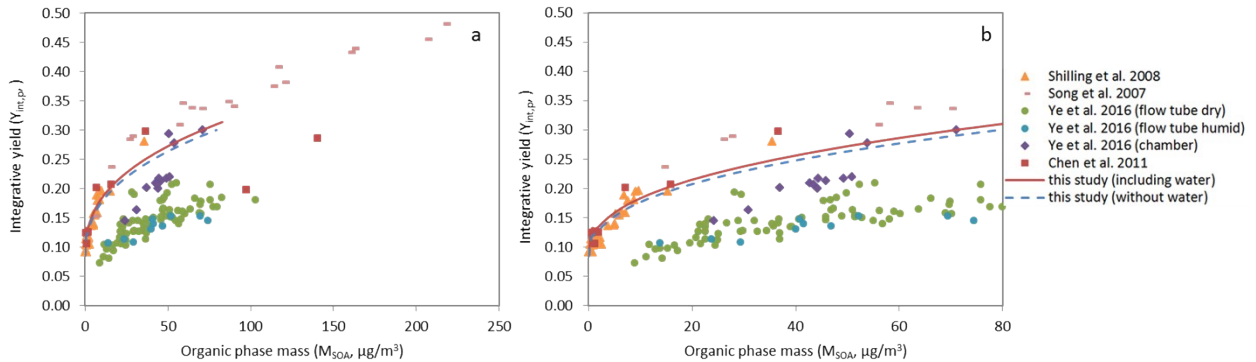

52

53 Figure S5 Comparison of SOA integrative yield between this study and laboratory studies. Panel a  
54 shows organic phase mass: 0-250  $\mu\text{g}/\text{m}^3$ . Panel b shows organic phase mass: 0-80  $\mu\text{g}/\text{m}^3$

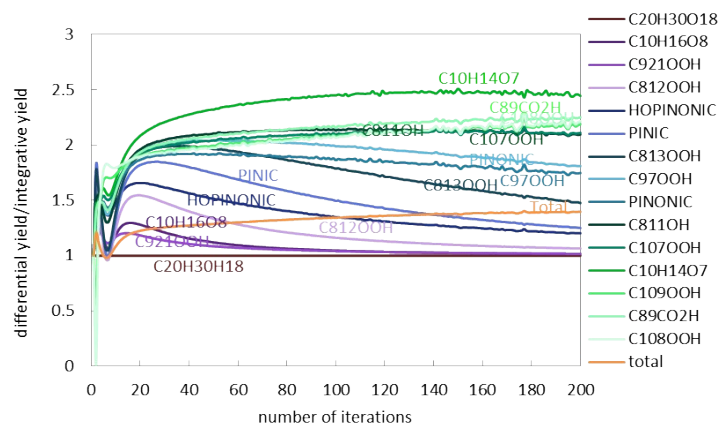

55

56 Figure S6 The ratio between differential yield and integrative yield

57 Partitioning coefficient of one organic compound between organic and gas phase ( $K_{org/gas}$  in unit  
 58 of  $\text{m}^3$  gas per  $\text{m}^3$  organic phase) is defined as the ratio of equilibrium organic phase  
 59 concentration and the equilibrium gas phase concentration.  $K_{org/gas}$ s are relatively stable during  
 60 the iterations (change of  $\log K_{org/gas}$  is mostly less than one order of magnitude), with only some  
 61 fluctuation during the first few iterations. This is different from the dramatic change of the  
 62 phase composition.

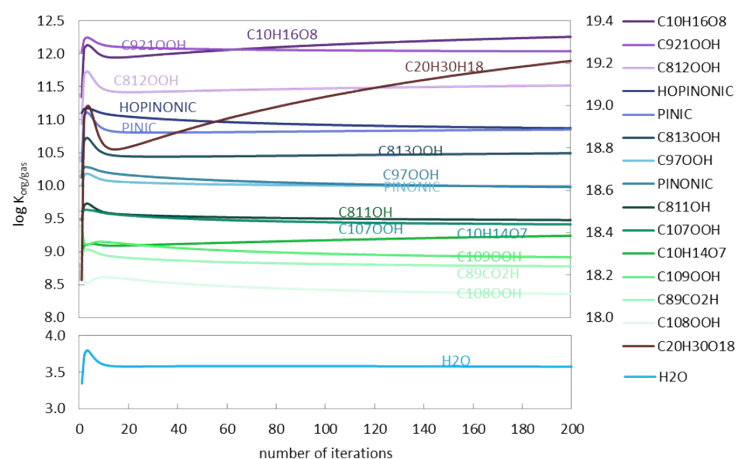

63

64 Figure S7 Logarithm of organic-gas phase partitioning coefficient ( $\log K_{org/gas}$ ) at different  
 65 iterations.  $\log K_{org/gas}$  for C20H20O18 is shown on the second Y-axis.

66

## 67 Calculation of activity coefficients in organic phase

68 The gas-particle (or organic matter) partitioning coefficients defined by Pankow (1994) is:

$$69 K_{org,i}' = R \cdot T / (10^6 \cdot \gamma_i \cdot p_{L,i}^* \cdot M_{org}) \quad (1)$$

70 where  $R$  is gas constant ( $\text{m}^3 \text{Pa K}^{-1} \text{mol}^{-1}$ ),  $T$  is temperature (K),  $M_{org}$  is the average molecular  
 71 weight of the absorbing organics (g/mol),  $p_{L,i}^*$  is the saturation vapour pressure of  $i$  in its pure  
 72 liquid state (Pa) and  $\gamma_i$  is the activity coefficient of species  $i$  in the organic phase.  $K_{org,i}'$  is in unit  
 73 of  $\text{m}^3 \text{ (air)} / \mu\text{g (absorbing organics)}$ .  $K_{org,i}'$  can be converted to  $K_{org/gas}$  (in unit of  $\text{m}^3 \text{ (air)} / \text{m}^3$   
 74 (absorbing organics)) by assuming a density of the absorbing organic of  $1.2 \text{ g/cm}^3$ .

75 With eq (1), we can calculate the activity coefficient  $\gamma_i$  of each compound in the organic phase  
 76 by assuming  $M_{org}$  is  $200 \text{ g/mol}$ , or using the actual organic phase average molar weight (Figure  
 77 S8).

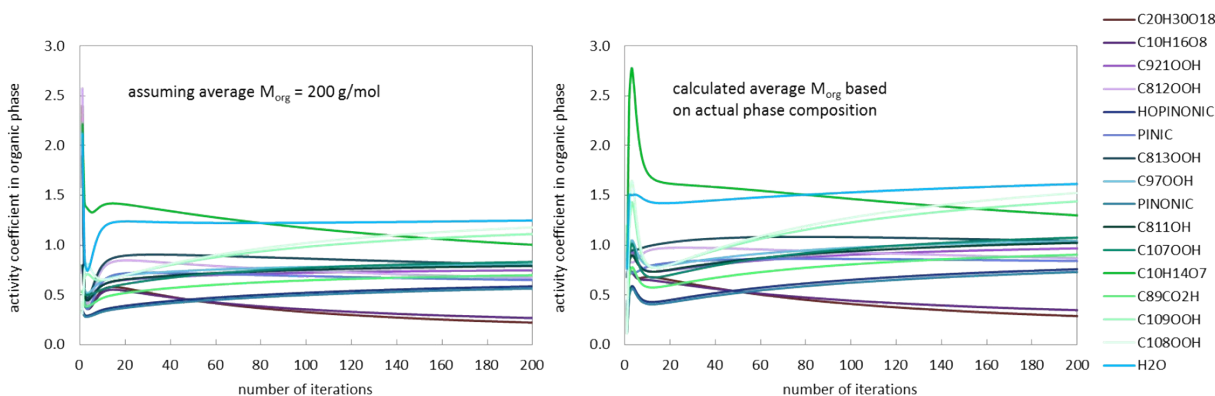

78  
 79 Figure S8 Activity coefficients for each component in the organic phase.

80 The calculated activity coefficients are smaller than 1 for most of the compounds, except for  
 81  $\text{H}_2\text{O}$  and  $\text{C10H14O7}$ . This means SOA mass would be underestimated by assuming activity  
 82 coefficient of one for these compounds in SOA. There is a decrease of activity coefficient for  
 83  $\text{C20H30O18}$ ,  $\text{C10H16O8}$ ,  $\text{C10H14O7}$ ,  $\text{C812OOH}$ ,  $\text{C813OOH}$  and  $\text{PINIC}$  with more iterations,  
 84 indicating that the phase composition becomes more favorable.

85 O:C and H:C ratios of the organic phase are calculated for SOA at different loadings and  
 86 iterations (Figure S9). O:C is higher at lower loadings while H:C is the opposite. O:C decreases  
 87 from 0.90 at the beginning ( $\text{C20H30O18}$ ) to 0.56 at loading of  $80 \mu\text{g/m}^3$  (see phase composition  
 88 in Figure 2b).

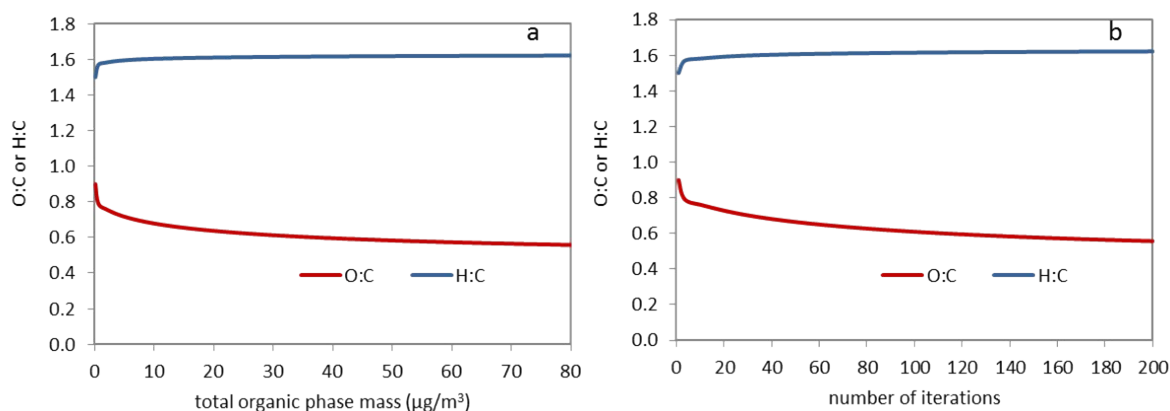

89  
90 Figure S9 O:C and H:C ratios in aerosol organic phase

### 91 Contribution of water in the organic phase

92 Other than the organic compounds, water is another important component in the organic  
93 phase, contributing an average of 4-5% of the mass in the organic phase (Figure 2b). Water  
94 uptake in reality is more complicated (Jathar et al., 2016; Pajunoja et al., 2015). In this study,  
95 equilibrium partitioning of water between gas and organic phase is the only pathway for water  
96 uptake by organics. In the first few iterations, water mass fraction in the organic phase is  
97 relatively higher due to higher organic-gas partitioning coefficients (Figure S7). The decrease of  
98 water fraction agrees with the trend of decreasing O:C ratio (Figure S9) at the beginning. This is  
99 reasonable because a higher O:C ratio suggests a higher polarity and larger ability to take up  
100 water.

### 101 Comparison with Wang et al. (2015)

102 The composition and mass in this study at the 100th iteration are compared for the scenario in  
103 (Wang et al., 2015) when 100 μg of α-pinene oxidation products partition to form SOA. The  
104 mass and composition in both organic phase and aqueous phase are very similar in the two  
105 scenarios when the total amount of added oxidation products is the same. Most organic  
106 compounds are in the organic phase, in agreement with previous studies for α-pinene  
107 ozonolysis products (Mouchel-Vallon et al., 2013; Wang et al., 2015; Zuend and Seinfeld, 2012).  
108 The small fraction in aqueous phase is due to the low water solubility of these oxidation  
109 products and salting out effect of ammonium sulfate in the aqueous phase, as well as the small  
110 liquid water content. In the organic phase, compounds with higher partitioning coefficients and

usually lower vapor pressure (See Figure S1 and S7 in supporting information) are the dominant components. Water contributes around 5% of the mass in the organic phase. Organic compounds contribute only little to the aqueous phase, whose composition is also similar in the two scenarios. Major organic component in the aqueous phases are C812OOH, PINIC, and C813OOH.

## References

- Chen, Q., Liu, Y., Donahue, N.M., Shilling, J.E. and Martin, S.T., 2011, Particle-Phase Chemistry of Secondary Organic Material: Modeled compared to measured O:C and H:C elemental ratios provide constraints. *Environ. Sci. Technol.*, 45: 4763-4770.
- Ehn, M., Thornton, J.A., Kleist, E., Sipila, M., Junninen, H., Pullinen, I., Springer, M., Rubach, F., Tillmann, R., Lee, B., Lopez-Hilfiker, F., Andres, S., Acir, I.H., Rissanen, M., Jokinen, T., Schobesberger, S., Kangasluoma, J., Kontkanen, J., Nieminen, T., Kurten, T., Nielsen, L.B., Jorgensen, S., Kjaergaard, H.G., Canagaratna, M., Dal Maso, M., Berndt, T., Petaja, T., Wahner, A., Kerminen, V.M., Kulmala, M., Worsnop, D.R., Wildt, J. and Mentel, T.F., 2014, A large source of low-volatility secondary organic aerosol. *Nature*, 506: 476-479.
- Jathar, S.H., Mahmud, A., Barsanti, K.C., Asher, W.E., Pankow, J.F. and Kleeman, M.J., 2016, Water uptake by organic aerosol and its influence on gas/particle partitioning of secondary organic aerosol in the United States. *Atmos. Environ.*, 129: 142-154.
- Klamt, A. and Eckert, F., 2000, COSMO-RS: a novel and efficient method for the a priori prediction of thermophysical data of liquids. *Fluid Phase Equilib.*, 172: 43-72.
- Klamt, A., 2005, *From Quantum Chemistry to Fluid Phase Thermodynamics and Drug Design*. Elsevier, Amsterdam
- Mouchel-Vallon, C., Bräuer, P., Camredon, M., Valorso, R., Madronich, S., Herrmann, H. and Aumont, B., 2013, Explicit modeling of volatile organic compounds partitioning in the atmospheric aqueous phase. *Atmos. Chem. Phys.*, 13: 1023-1037.
- Pajunoja, A., Lambe, A.T., Hakala, J., Rastak, N., Cummings, M.J., Brogan, J.F., Hao, L., Paramonov, M., Hong, J., Prisle, N.L., Malila, J., Romakkaniemi, S., Lehtinen, K.E.J., Laaksonen, A., Kulmala, M., Massoli, P., Onasch, T.B., Donahue, N.M., Riipinen, I., Davidovits, P., Worsnop, D.R., Petäjä, T. and Virtanen, A., 2015, Adsorptive uptake of water by semisolid secondary organic aerosols. *Geophys. Res. Lett.*, 42: 3063-3068.
- Pankow, J.F., 1994, An absorption-model of gas-particle partitioning of organic-compounds in the atmosphere. *Atmos. Environ.*, 28: 185-188.
- Shilling, J.E., Chen, Q., King, S.M., Rosenoern, T., Kroll, J.H., Worsnop, D.R., McKinney, K.A. and Martin, S.T., 2008, Particle mass yield in secondary organic aerosol formed by the dark ozonolysis of  $\alpha$ -pinene. *Atmos. Chem. Phys.*, 8: 2073-2088.
- Shilling, J.E., Chen, Q., King, S.M., Rosenoern, T., Kroll, J.H., Worsnop, D.R., DeCarlo, P.F., Aiken, A.C., Sueper, D., Jimenez, J.L. and Martin, S.T., 2009, Loading-dependent elemental composition of alpha-pinene SOA particles. *Atmos. Chem. Phys.*, 9: 771-782.
- Song, C., Zaveri, R.A., Alexander, M.L., Thornton, J.A., Madronich, S., Ortega, J.V., Zelenyuk, A., Yu, X.Y., Laskin, A. and Maughan, D.A., 2007, Effect of hydrophobic primary organic aerosols on secondary organic aerosol formation from ozonolysis of alpha-pinene. *Geophys. Res. Lett.*, 34: 5.
- Wang, C., Lei, Y.D., Endo, S. and Wania, F., 2014, Measuring and modeling the salting-out effect in ammonium sulfate solutions. *Environ. Sci. Technol.*, 48: 13238-13245.



154 Wang, C., Goss, K.-U., Lei, Y.D., Abbatt, J.P.D. and Wania, F., 2015, Calculating equilibrium phase  
 155 distribution during the formation of Secondary Organic Aerosol using COSMOtherm. *Environ. Sci.*  
 156 *Technol.*, 49: 8585-8594.  
 157 Wania, F., Lei, Y.D., Wang, C., Abbatt, J.P.D. and Goss, K.U., 2014, Novel methods for predicting gas–  
 158 particle partitioning during the formation of secondary organic aerosol. *Atmos. Chem. Phys.*, 14:  
 159 13189-13204.  
 160 Ye, J., Gordon, C.A. and Chan, A.W.H., 2016, Enhancement in Secondary Organic Aerosol formation in  
 161 the presence of preexisting organic particle. *Environ. Sci. Technol.*, 50: 3572-3579.  
 162 Zuend, A., Marcolli, C., Luo, B.P. and Peter, T., 2008, A thermodynamic model of mixed organic-inorganic  
 163 aerosols to predict activity coefficients. *Atmos. Chem. Phys.*, 8: 4559-4593.  
 164 Zuend, A. and Seinfeld, J.H., 2012, Modeling the gas-particle partitioning of secondary organic aerosol:  
 165 the importance of liquid-liquid phase separation. *Atmos. Chem. Phys.*, 12: 3857-3882.
